# Supplementary material
Source: HighWire-hosted journal article supplement (https://bmjopen.bmj.com/content/9/8/e031558)
Supplement: inline-supplementary-material-1 [file inline-supplementary-material-1.pdf]

## DATA Extraction Form

Data Extractor Name:

Date:

Title of the study:

|                                                                                                                                                       | Extracted Data | Place where the data is mentioned in the text (page, paragraph, line) |
|-------------------------------------------------------------------------------------------------------------------------------------------------------|----------------|-----------------------------------------------------------------------|
| <b>First Author, Year</b>                                                                                                                             |                |                                                                       |
| <b>Inclusion/exclusion criteria of the study</b>                                                                                                      |                |                                                                       |
| <b>Study type (cross-sectional or cohort)</b>                                                                                                         |                |                                                                       |
| <b>Period of study</b>                                                                                                                                |                |                                                                       |
| <b>Place of sample collection</b>                                                                                                                     |                |                                                                       |
| <b>Definition of diabetes</b>                                                                                                                         |                |                                                                       |
| <b>Sample size</b>                                                                                                                                    |                |                                                                       |
| Number of participants with type 1 diabetes                                                                                                           |                |                                                                       |
| Number of participants with type 2 diabetes                                                                                                           |                |                                                                       |
| <b>Demographic information</b>                                                                                                                        |                |                                                                       |
| Mean age                                                                                                                                              |                |                                                                       |
| Male/female (%)                                                                                                                                       |                |                                                                       |
| Mean systolic or diastolic blood pressure                                                                                                             |                |                                                                       |
| Mean BMI                                                                                                                                              |                |                                                                       |
| <b>Index Test (eGFR formula)</b>                                                                                                                      |                |                                                                       |
| <b>Persons executing and interpreting index tests (numbers, training, and expertise)</b>                                                              |                |                                                                       |
| <b>Is the formula corrected for body surface area?</b>                                                                                                |                |                                                                       |
| <b>Method of creatinine measurement and calibration</b>                                                                                               |                |                                                                       |
| <b>Reference Test (mGFR) Marker used</b>                                                                                                              |                |                                                                       |
| <b>Persons executing and interpreting reference test</b>                                                                                              |                |                                                                       |
| <b>Was the marker injected once or was it infused during a specific period of time?</b>                                                               |                |                                                                       |
| <b>If the exogenous filtration marker was delivered via single injection, was the reported mGFR corrected based on Brochner-Mortensen correction?</b> |                |                                                                       |
| <b>Setting of data collection</b>                                                                                                                     |                |                                                                       |
| <b>Index/reference time interval and treatments carried out in between</b>                                                                            |                |                                                                       |
| <b>Mean eGFR</b>                                                                                                                                      |                |                                                                       |

|                                                                                                                                                                          |  |  |
|--------------------------------------------------------------------------------------------------------------------------------------------------------------------------|--|--|
| <b>Mean mGFR</b>                                                                                                                                                         |  |  |
| <b>Definition of bias</b>                                                                                                                                                |  |  |
| Reported value of Bias                                                                                                                                                   |  |  |
| <b>Definition of accuracy</b>                                                                                                                                            |  |  |
| Reported value of Accuracy                                                                                                                                               |  |  |
| <b>Definition of precision</b>                                                                                                                                           |  |  |
| Reported value of Precision                                                                                                                                              |  |  |
| <b>Bland-Altman plot (Limit of agreement)</b>                                                                                                                            |  |  |
| <b>Scatter plot of mGFR versus eGFR</b>                                                                                                                                  |  |  |
| <b>Any report of line of perfect concordance, Lin's concordance correlation, intra-class correlation coefficient (ICC), reduced major axis regression (RMA) analysis</b> |  |  |
| <b>Results in GFR categories (bias, accuracy, precision)</b>                                                                                                             |  |  |
| GFR< 60 ml/min/1.73m <sup>2</sup>                                                                                                                                        |  |  |
| GFR 60-90 ml/min/1.73m <sup>2</sup>                                                                                                                                      |  |  |
| GFR≥ 90 ml/min/1.73m <sup>2</sup>                                                                                                                                        |  |  |
| <b>Results based on type of diabetes</b>                                                                                                                                 |  |  |
